# Supplementary material for: Dissociation cross sections and rates in O2 + N collisions: molecular dynamics simulations combined with machine learning
Source: Royal Society of Chemistry journal article supplement (doi:10.1039/d3cp04044e), 2023-01-01
Supplement: d3cp04044e1.pdf [file d3cp04044e1.pdf]

## Supplementary Information

### Dissociation cross sections and rates in O<sub>2</sub> + N collisions: molecular dynamics simulations combined with machine learning

Xia Huang,<sup>a</sup> Kun-Ming Gu,<sup>a</sup> Chang-Min Guo<sup>a</sup> and Xin-Lu Cheng<sup>\*ab</sup>

<sup>a</sup>Institute of Atomic and Molecular Physics, Sichuan University, Chengdu 610065, China

<sup>b</sup>Key Laboratory of High Energy Density Physics and Technology of Ministry of Education, Sichuan University, Chengdu 610065, China

Table S1. Re-optimized parameters of the short-range term  $V_{SR}(r)$  for the O<sub>2</sub> potential.<sup>1,2</sup>

| Parameter                 | Value                                      |
|---------------------------|--------------------------------------------|
| $\alpha, \text{\AA}^{-2}$ | $9.439\ 784\ 362\ 354\ 936 \times 10^{-1}$ |
| $\beta$                   | 1.262 242 998 506 810                      |
| $a_0$ , millihartree      | $-1.488\ 979\ 427\ 684\ 798 \times 10^3$   |
| $a_1$ , millihartree      | $1.881\ 435\ 846\ 488\ 955 \times 10^4$    |
| $a_2$ , millihartree      | $-1.053\ 475\ 425\ 838\ 226 \times 10^5$   |
| $a_3$ , millihartree      | $2.755\ 135\ 591\ 229\ 064 \times 10^5$    |
| $a_4$ , millihartree      | $-4.277\ 588\ 997\ 761\ 775 \times 10^5$   |
| $a_5$ , millihartree      | $4.404\ 104\ 009\ 614\ 092 \times 10^5$    |
| $a_6$ , millihartree      | $-2.946\ 204\ 062\ 950\ 765 \times 10^5$   |
| $a_7$ , millihartree      | $1.176\ 861\ 219\ 078\ 620 \times 10^5$    |

Table S2. Rovibrational energies (in eV) for the ground electronic state O<sub>2</sub>, including 4572 bond states and 1540 quasi-bond states based on the WKB method.

| $v$ | $j_{max}(v)$ | Energy range |
|-----|--------------|--------------|
| 0   | 248          | 0.098-8.703  |
| 1   | 242          | 0.292-8.477  |
| 2   | 237          | 0.483-8.303  |
| 3   | 233          | 0.671-8.177  |
| 4   | 228          | 0.855-8.013  |
| 5   | 224          | 1.037-7.895  |
| 6   | 216          | 1.215-7.617  |
| 7   | 215          | 1.391-7.631  |
| 8   | 210          | 1.564-7.488  |
| 9   | 206          | 1.733-7.386  |
| 10  | 202          | 1.9-7.288    |
| 11  | 197          | 2.064-7.159  |
| 12  | 193          | 2.226-7.069  |
| 13  | 188          | 2.384-6.949  |
| 14  | 184          | 2.54-6.866   |
| 15  | 179          | 2.693-6.756  |
| 16  | 175          | 2.843-6.681  |

|    |     |             |
|----|-----|-------------|
| 17 | 170 | 2.99-6.579  |
| 18 | 165 | 3.134-6.483 |
| 19 | 160 | 3.276-6.392 |
| 20 | 155 | 3.414-6.305 |
| 21 | 150 | 3.55-6.224  |
| 22 | 145 | 3.682-6.146 |
| 23 | 140 | 3.811-6.074 |
| 24 | 134 | 3.936-5.984 |
| 25 | 129 | 4.058-5.921 |
| 26 | 123 | 4.177-5.843 |
| 27 | 117 | 4.291-5.772 |
| 28 | 111 | 4.401-5.706 |
| 29 | 105 | 4.507-5.646 |
| 30 | 98  | 4.608-5.577 |
| 31 | 91  | 4.704-5.516 |
| 32 | 84  | 4.795-5.463 |
| 33 | 76  | 4.879-5.406 |
| 34 | 68  | 4.956-5.358 |
| 35 | 59  | 5.026-5.31  |
| 36 | 49  | 5.086-5.267 |
| 37 | 40  | 5.135-5.239 |
| 38 | 36  | 5.169-5.232 |
| 39 | 30  | 5.187-5.224 |
| 40 | 25  | 5.197-5.219 |
| 41 | 19  | 5.205-5.215 |
| 42 | 13  | 5.209-5.213 |

Table S3. Progressive Nikitin factor in the dissociative reaction  $O_2(v) + N \rightarrow O + O + N^3$

| vibrational levels  | Nikitin factor |
|---------------------|----------------|
| $v \leq 6$          | 1              |
| $7 \leq v \leq 10$  | 5/3            |
| $11 \leq v \leq 26$ | 2              |
| $27 \leq v \leq 28$ | 7/3            |
| $v = 29$            | 13/3           |
| $30 \leq v$         | 16/3           |

## References

- 1 Z. Varga, Y. Liu, J. Li, Y. Paukku, H. Guo and D. G. Truhlar, *J. Chem. Phys.*, 2021, **154**, 084304.
- 2 Y. Paukku, K. R. Yang, Z. Varga, G. Song, J. D. Bender and D. G. Truhlar, *J. Chem. Phys.*, 2017, **147**, 034301.
- 3 F. Esposito and I. Armenise, *J. Phys. Chem. A*, 2021, **125**, 3953–3964.
